# Supplementary material
Source: publisher figshare collection journal article supplement (https://tandf.figshare.com/ndownloader/files/22317678)
Supplement: Supplementary file 1 [file 22317678]

#NEXUS
[written Tue Oct 29 01:32:28 EDT 2019 by Mesquite  version 3.2 (build 801) at DESKTOP-IB06MCI/10.0.0.231]

BEGIN TAXA;
	TITLE Taxa;
	DIMENSIONS NTAX=33;
	TAXLABELS
		'Bud_Bori_Herpomyces_stylopygae' 'Bud_Bori_2_Herpomyces_stylopygae' 'Bud_Slat_Herpomyces_shelfordellae' 'DE_HerpBL1_Herpomyces_shelfordellae' 'DH1427a_Herpomyces_shelfordellae' 'MG202b_Herpomyces_shelfordellae' 'DH1415a_Herpomyces_shelfordellae' 'MG001_Herpomyces_ectobiae' 'TW793a_Herpomyces_ectobiae' 'DH435b_Herpomyces_chaetophilus' 'DH483b_Herpomyces_chaetophilus' 'DH1097b_Herpomyces_chaetophilus' 'DH1097c_Herpomyces_chaetophilus' 'DH602b_Herpomyces_chaetophilus' 'TW437c_Herpomyces_periplanetae' 'TW448b_Herpomyces_periplanetae' 'DH602a_Herpomyces_periplanetae' 'DH654c_Herpomyces_periplanetae' 'DH654b_Herpomyces_periplanetae' 'DH602c_Herpomyces_periplanetae' 'DH602d_Herpomyces_periplanetae' 'DH620a_Herpomyces_periplanetae' 'DH1187d_Herpomyces_periplanetae' 'DH1365a_Herpomyces_paranensis' 'DH1365b_Herpomyces_paranensis' 'Debr_Ppal_Herpomyces_leurolestis' '2017/0199_Herpomyces_leurolestis' 'DH1417b_Herpomyces_leurolestis' 'MN597427_Herpomyces_spegazzinii' 'MN597428_Herpomyces_spegazzinii' 'Pyxidiophora_arvernensis_CBS253_81' 'MG200_Pyxidiophora_microspora' 'Pyxidiophora_arvernensis_CBS657_82' 
	;

END;


BEGIN CHARACTERS;
	TITLE  Character_Matrix;
	DIMENSIONS  NCHAR=844;
	FORMAT DATATYPE = DNA GAP = - MISSING = ?;
	MATRIX
	'Bud_Bori_Herpomyces_stylopygae'     -?????????????????????????????????GGTCATTTAGAGGAAGTAAAAGTCGTAACAAGGTTTCCGTAGGT-GAACCTGCGGAAGGATCATTAATGAGTATCGTCGAATTTTGCTTTCCGTGTGGACGAAGGTCTGCGCGGGAAGTGATTTA---TTCGCGTATATTACTTACCAAACGTTGAACTGATACGTGGTGGCGCATGTCGAACACT---TGTTGGCCGCACT------------------TGCGCTACCACCATTAGCCTATAATTTTACATGTGATGGCGAACTTTTTTACAATTA-----CAAGTT-ATAT------------AAACTTTCAACAATGGATCTCTTGGTTCTGGCATCGATGAAGAACGCGGCAAAATGCGATAAGTAATGTGAATTGCAGAAATTAGTGAATCATCGAATC-TTTGAACGCAAATTGCGCTTTCTGGTATTCCGGAAAGCACACCTGTTCGAGCGTCAATTTTCA-AAGTTA--ATATCCGCTAC-TTGCTCTTGCCGGTCGGATGTTTTGGATGAACATTGCTGTAT-AGGCTGCTGTATGGTGGCATTGGTTGGCACATC---------TGAAAATGATCTATAGCGTTGCGAAATGCTTCGGTGGTAGCAATGTTGAAGGCTTTTGTCTTCTCTTTCAGCCTTGAAG-----TGTGGAGCGTGT------TTTGCGC-ATTGAGG------CTGGCGCTAGCT--GTAAAGTTGTTTTAGCGTTAGCCGTGAAACTTGTGACCTCG-AATCAGGT--GGGAGTACCCGCTGAACTT--AAGCATATCAATTAAGCGG??????-
	'Bud_Bori_2_Herpomyces_stylopygae'   -??????????????????????????????CTTGGTCATTTAGAGGAAGTAAAAGTCGTAACAAGGTTTCCGTAGGT-GAACCTGCGGAAGGATCATTAATGAGTATCGTCGAATTTTGCTTTCCGTGTGGACGAAGGTCTGCGCGGGAAGTGATTTA---TTCGCGTATATTACTTACCAAACGTTGAACTGATACGTGGTGGCGCATGTCGAACACT---TGTTGGCCGCACT------------------TGCGCTACCACCATTAGCCTATAATTTTACATGTGATGGCGAACTTTTTTACAATTA-----CAAGTT-ATAT------------AAACTTTCAACAATGGATCTCTTGGTTCTGGCATCGATGAAGAACGCGGCAAAATGCGATAAGTAATGTGAATTGCAGAAATTAGTGAATCATCGAATC-TTTGAACGCAAATTGCGCTTTCTGGTATTCCGGAAAGCACACCTGTTCGAGCGTCAATTTTCA-AAGTTA--ATATCCGCTAC-TTGCTCTTGCCGGTCGGATGTTTTGGATGAACATTGCTGTAT-AGGCTGCTGTATGGTGGCATTGGTTGGCACATC---------TGAAAATGATCTATAGCGTTGCGAAATGCTTCGGTGGTAGCAATGTTGAAGGCTTTTGTCTTCTCTTTCAGCCTTGAAG-----TGTGGAGCGTGT------TTTGCGC-ATTGAGG------CTGGCGCTAGCT--GTAAAGTTGTTTTAGCGTTAGCCGTGAAACTTGTGACCTCG-AATCAGGT--GGGAGTACCCGCTGAACTT--AAGCATATCAATAAGCGGAGG???--
	'Bud_Slat_Herpomyces_shelfordellae'  ????????????????????????????????TGGTCATTTTAGAGGAAGTAAAAGTCGTAACAAGGTTTCCGTAGGT-GAACCTGCGGAAGGATCATTAACGAGTATCGTTGGATTTCGGTTTTTGAGTTGACGAAAGTCCTCTCAGAAAGTGAAATA---TCCACGTACAATACTTACCAAACGTCGAAATGATACGTGGTAGCACGATTCGAGCACTCGCTAATCGTAAT---------------------CGTGCTGTCACCATTAATCTATAATTTTAC--ATGATGGCGAGAACACATACAAAATA----CAAGTT-GTAT------------AAACTTTCAACAATGGATCTCTTGGTTCTGGCATCGATGAAGAACGCGGCAAAATGCGATAAGTAATGTGAATTGCAGAATTTAGTGAATCATCGAATC-TTTGAACGCAAATTGCGCTTTCTGGTATTCCGGAAAGCACACCTGTTCGAGCGTCAATTTTCA-AATGTA--ATATCCAATG--GTTGCTTTGCGAATTGGATGTATTGGATGACCGTTGCTGTGT-TTGCTGCT-TAATGTGGCGTCGATCGGCACATC---------CGAAAGTGGTCTATAGCGTTGCGATGCGCTTCGGTTGTAGCAATGATGGAGACATTTGTCTCCGCTTTCAGCCTTGAGG-----TGTTAAGCTTAT------TTTACAT-AATCAGG------TTAGCGCTAGTTATGTAAAACTA-ACTAGCAATAGCCGTGAAATTTGTGACCTCG-AATCAGGT--GGGAGTACCCGCTGAACTT--AAGCATATCATTAAGC????????--
	'DE_HerpBL1_Herpomyces_shelfordellae' ??????????????????????????????????????????????????????????????????????CCGTAGGTAGAACCTGCGGAAGGATCATTAACGAGTATCGTTGGATTTCGGTTTTTGAGTTGACGAAAGTCCTCTCAGAAAGTGAAATA---TCCACGTACAATACTTACCAAACGTCGAAATGATACGTGGTAGCACGATTCGAGCACTCGCTAATCGTAAT---------------------CGTGCTGTCACCATTAATCTATAATTTTAC--ATGATGGCGAGAACACATACAAAATA----CAAGTT-GTAT------------AAACTTTCAACAATGGATCTCTTGGTTCTGGCATCGATGAAGAACGCGGCAAAATGCGATAAGTAATGTGAATTGCAGAATTTAGTGAATCATCGAATC-TTTGAACGCAAATTGCGCTTTCTGGTATTCCGGAAAGCACACCTGTTCGAGCGTCAATTTTCA-AATGTA--ATATCCAATG--GTTGCTTTGCGAATTGGATGTATTGGATGACCGTTGCTGTGT-TTGCTGCT-TAATGTGGCGTCGATCGGCACATC---------CGAAAGTGGTCTATAGCGTTGCGATGCGCTTCGGTTGTAGCAATGATGGAGACATTTGTCTCCGCTTTCAGCCTTGAGG-----TGTTAAGCTTAT------TTTACAT-AATCAGG------TTAGCGCTAGTTATGTAAAACTA-ACTAGCAATAGCCGTGAAATTTGTGACCTCG-AATCAGGT--GGGAGTACCCGCTGAACTT--AAGCATATCATTAAGCGGA?????--
	'DH1427a_Herpomyces_shelfordellae'   ----------------------------------------------GAAGTAAAAGTCGTAACAAGGTTTCCGTAGGT-GAACCTGCGGAAGGATCATTAACGAGTATCGTTGGATTTCGGTTTTTGAGTTGACGAAAGTCCTCTCAGAAAGTGAAATA---TCCACGTACAATACTTACCAAACGTCGAAATGATACGTGGTAGCACGATTCGAGCACTCGCTAATCGTAAT---------------------CGTGCTGTCACCATTAATCTATAATTTTAC--ATGATGGCGAGAACACATACAAAATA----CAAGTT-GTAT------------AAACTTTCAACAATGGATCTCTTGGTTCTGGCATCGATGAAGAACGCGGCAAAATGCGATAAGTAATGTGAATTGCAGAATTTAGTGAATCATCGAATC-TTTGAACGCAAATTGCGCTTTCTGGTATTCCGGAAAGCACACCTGTTCGAGCGTCAATTTTCA-AATGTA--ATATCCAATG--GTTGCTTTGCGAATTGGATGTATTGGATGACCGTTGCTGTGTCTTGCTGCT-TAATGTGGCGTCGATCGGCACATC---------CGAAAGTGGTCTATAGCGTTGCGATGCGCTTCGGTTGTAGCAATGATGGAGACATTTGTCTCCGCTTTCAGCCTTGAGG-----TGTTAAGCTTATG---CGTTTACAT-AATCAGG------TTAGCGCTAGTTATGTAAAACTA-ACTAGCAATAGCCGTGAAATTTGTGACCTCG-AATCAGGT--GGGAGTACCCGCTGAACTT--AAGCATATC-----------------
	'MG202b_Herpomyces_shelfordellae'    ---------------------------------------TTTAGAGGAAGTAAAAGTCGTAACAAGGTTTCCGTAGGT-GAACCTGCGGAAGGATCATTAACGAGTATCGTTGGATTTCGGTTTTTGAGTTGACGAAAGTCCTCTCAGAAAGTGAAATA---TCCACGTACAATACTTACCAAACGTCGAAATGATACGTGGTAGCACGATTCGAGCACTCGCTAATCGTAAT---------------------CGTGCTGTCACCATTAATCTATAATTTTAC--ATGATGGCGAGAACACATACAAAATA----CAAGTT-GTAT------------AAACTTTCAACAATGGATCTCTTGGTTCTGGCATCGATGAAGAACGCGGCAAAATGCGATAAGTAATGTGAATTGCAGAATTTAGTGAATCATCGAATC-TTTGAACGCAAATTGCGCTTTCTGGTATTCCGGAAAGCACACCTGTTCGAGCGTCAATTTTCA-AATGTA--ATATCCAATG--GTTGCTTTGCGAATTGGATGTATTGGATGACCGTTGCTGTGTCTTGCTGCT-TAATGTGGCGTCGATCGGCACATC---------CGAAAGTGGTCTATAGCGTTGCGATGCGCTTCGGTTGTAGCAATGATGGAGACATTTGTCTCCGCTTTCAGCCTTGAGG-----TGTTAAGCTTATG---CGTTTACAT-AATCAGG------TTAGCGCTAGTTATGTAAAACTA-ACTAGCAATAGCCGTGAAATTTGTGACCTCG-AATCAGGT--GGGAGTACCCGCTGAACTT--AAGCATATCAATAAGCGGAGGAA---
	'DH1415a_Herpomyces_shelfordellae'   ????????????????????????????????????????????????????????????????????????????????AACCTGCGGAAGGATCATTAACGAGTATCGTTGGATTTCGGTTTTTGAGTTGACGAAAGTCCTCTCAGAAAGTGAAATA---TCCACGTACAATACTTACCAAACGTCGAAATGATACGTGGTAGCACGATTCGAGCACTCGCTAATCGTAAT---------------------CGTGCTGTCACCATTAATCTATAATTTTAC--ATGATGGCGAGAACACATACAAAATA----CAAGTT-GTAT------------AAACTTTCAACAATGGATCTCTTGGTTCTGGCATCGATGAAGAACGCGGCAAAATGCGATAAGTAATGTGAATTGCAGAATTTAGTGAATCATCGAATC-TTTGAACGCAAATTGCGCTTTCTGGTATTCCGGAAAGCACACCTGTTCGAGCGTCAATTTTCA-AATGTA--ATATCCAATGG-TTGCT-TTGCGAATTGGATGTATTGGATGACCGTTGCTGTGT-TTGCTGCT-TAATGTGGCGTCGATCGGCACATC---------CGAAAGTGGTCTATAGCGTTGCGATGCGCTTCGGTTGTAGCAATGATGGAGACATTTGTCTCCGCT?????????????-----????????????-?--?????????-???????------???????????????????????????????????????????????????????-????????--???????????????????--?????????????????????????-
	'MG001_Herpomyces_ectobiae'          ??????????????????????????????????????????????????????????????????????CCGTAGGT-GAACCTGCGGAAGGATCATTACTGAGTGT----AAATTGAAGTTTATGTGTGTGCTGTTGATTTTGCAAAAGGTATATTT---CACTAATACATATTTTACCCAATGTTAATACGTTGTGGAATCGTAAATTGCGTTTTCTTAATAACTGTTAATGT------------------AATAGCCACCGAAGTAATCTATGCA---ACATGTTATTGCTGTATATGTCGGATAAAACTTACAATAT--TTT------------AAACTTTCAACAATGGATCTCTTGGTTCTGGCATCGATGAAGAACGCGGTGAAATGCGATAAGTAATGTGAATTGCAGAAATTAGTGAATCATCGAATT-TTTGAACGCAAATTGCACCCCTTGGTATTCCGAGGGGTACACCTGTTCGAGCGTTGATTAAAACAAAA----ATATTTACAAT-TTTTGTAAGTTTGTTAAATGTATTGGAAGA--ATTGTCGCAA----------TAGTGTAGCATTAAACGACACTTC---------CGAAATATGTCAACGGCTGATCGCAAAGCTTCGGTTGTAGCAAAGTTGGAA---TTTTATTCTATCTTCAATCTTGAAG-----TACGAGCGGCGT----GTAATACAATGTAATTG------CTGGTGGTTATTGTATAA--------CAGCAGTAATTGTGATACAAGCGACCTCG-AATCAGGT--G??????????????????--?????????????????????????-
	'TW793a_Herpomyces_ectobiae'         ------------------------????????????????????????????????????????????????????????????????????????????????????????????????????ATGTGTGTGCTGTTGATTTTGCAAAAGGTATATTT---CACTAATACATATTTTACCCAATGTTAATACGTTGTGGAATCGTAAATTGCGTTTTCTTAATAACTGTTAATGT------------------AATAGCCACCGAAGTAATCTATGCA---ACATGTTATTGCTGTATATGTCGGATAAAACTTACAATAT--TTT------------AAACTTTCAACAATGGATCTCTTGGTTCTGGCATCGATGAAGAACGCGGTGAAATGCGATAAGTAATGTGAATTGCAGAAATTAGTGAATCATCGAATT-TTTGAACGCAAATTGCACCCCTTGGTATTCCGAGGGGTACACCTGTTCGAGCGTTGATTAAAACAAAA----ATATTTACAAT-TTTTGTAAGTTTGTTAAATGTATTGGAAGA--ATTGTCGCAA----------TAGTGTAGCATTAAACGACACTTC---------CGAAATATGTCAACGGCTGATCGCAAAGCTTCGGTTGTAGCAAAGTTGGAA---TTTTATTCTATCTTCAATCTTGAAG-----TACGAGCGGCGT----GTAATACAATGTAATTG------CTGGTGGTTATTGTATAA??????????????????????????????????????????????--???????????????????----------------------------
	'DH435b_Herpomyces_chaetophilus'     ??????????????????????????????????????????????????????????????????????????????????????????????????TAATGAGTGT-ATCGAGCTTCGCTCTTTGTAAGGATGAAAATTTTTACAAGGGGAGAATGA---CTCGCCTACATTATTCACCCAACGTTGAATTGATGCGTGATCGTGCTGTTCTTGTAGATGCTATTTACCGGAGTACAGACGAAGCTTTAGGAAGGGTTTTCCCATTTAATGATTTGTTT------TGAAGGCAAAATTTTA-------------CAAAAT-ATGT------------AAACTTTCAACAATGGATCTCTTGGTTCTGGCATCGATGAAGAACGCGGCAAAATGCGATAAGTAATGTGAATTGCAGAATTCAGTGAATCATCGAATC-TTTGAACGCAAATTGCGCTTTCTGGTATTCCGGAAAGCACACCTGTTCGAGCGTCAATTTTCA-GATACA--GTACCTTTATT-TCATTTGTATGCTACGGGTGTTATGGATGA--ATTGTTGCAT----------TAAGGTGACTTC---TGACACATC---------TGAAAAATGTCCGCGGCGCTATGGAATGCTTCGGTGGTAGCAAAATCGGAA------TTTTCCGCTTTCAGCCTTGAAG-----TTTTCAATGT------CGGCCACGTGAATTGGG------TTGGGGTTTGAACCTTTAAACGG-TTTAGAACTTGACT?????????????????-????????--???????????????????--?????---------------------
	'DH483b_Herpomyces_chaetophilus'     ???????????????????????????????????????????????????????????????????????????????????????????????CATTAATGAGTGT-ATCGAGCTTCGCTCTTTGTAAGGATGAAAATTTTTACAAGGGGAGAATGA---CTCGCCTACATTATTCACCCAACGTTGAATTGATGCGTGATCGTGCTGTTCTTGTAGATGCTATTTACCGGAGTACAGACGAAGCTTTAGGAAGGGTTTTCCCATTTAATGATTTGTTT------TGAAGGCAAAATTTTA-------------CAAAAT-ATGT------------AAACTTTCAACAATGGATCTCTTGGTTCTGGCATCGATGAAGAACGCGGCAAAATGCGATAAGTAATGTGAATTGCAGAATTCAGTGAATCATCGAATC-TTTGAACGCAAATTGCGCTTTCTGGTATTCCGGAAAGCACACCTGTTCGAGCGTCAATTTTCA-GATACA--GTACCTTTATT-TCATTTGTATGCTACGGGTGTTATGGATGA--ATTGTTGCAT----------TAAGGTGACTTC---TGACACATC---------TGAAAAATGTCCGCGGCGCTATGGAATGCTTCGGTGGTAGCAAAATCGGAA------TTTTCCGCTTTCAGCCTTGAAG-----TTTTCAATGT------CGGCCACGTGAATTGGG------TTGGGGTTTGAACCTTTAAACGG-TTTAGAACTTGACTTGAAGTTTGTGACCTCG-AATCAGGT--GGGAGTACCCGCTGA????--?????????????????????????-
	'DH1097b_Herpomyces_chaetophilus'    ??????????????????????????????????????????????GAAGTAAAAGTCGTAACAAGGTTTCCGTAGGT-GAACCTGCGGAAGGATCATTAATGAGTGT-ATCGAGCTTCGCTCTTTGTAAGGATGAAAATTTTTACAAGGGGAGAATGA---CTCGCCTACATTATTCACCCAACGTTGAATTGATGCGTGATCGTGCTGTTCTTGTAGATGCTATTTACCGGAGTACAGACGAAGCTTTAGGAAGGGTTTTCCCATTTAATGATTTGTTT------TGAAGGCAAAATTTTA-------------CAAAAT-ATGT------------AAACTTTCAACAATGGATCTCTTGGTTCTGGCATCGATGAAGAACG????????????????????????????????????????????????????????????????????????????????????????????????????????????????????????????????????????????????????????????????????????????????????????????????????????????????????????????????????????????????????????????????????????????????????????????????????????????????????????????????????????????????????------?????????????????????????????????????????????????????????????????????????????????????----------------------------
	'DH1097c_Herpomyces_chaetophilus'    ?????????????????????????????????????????????????????????????????????????????????????GCGGAAGGATCATTAATGAGTGT-ATCGAGCTTCGCTCTTTGTAAGGATGAAAATTTTTACAAGGGGAGAATGA---CTCGCCTACATTATTCACCCAACGTTGAATTGATGCGTGATCGTGCTGTTCTTGTAGATGCTATTTACCGGAGTACAGACGAAGCTTTAGGAAGGGTTTTCCCATTTAATGATTTGTTT------TGAAGGCAAAATTTTA-------------CAAAAT-ATGT------------AAACTTTCAACAATGGATCTCTTGGTTCTGGCATCGATGAAGAACGCGGCAAAATGCGATAAGTAATGTGAATTGCAGAATTCAGTGAATCATCGAATC-TTTGAACGCAAATTGCGCTTTCTGGTATTCCGGAAAGCACACCTGTTCGAGCGTCAATTTTCA-GATACA--GTACCTTTATT-TCATTTGTATGCTACGGGTGTTATGGATGA--ATTGTTGCAT----------TAAGGTGACTTC---TGACACATC---------TGAAAAATGTCCGCGGCGCTATGGAATGCTTCGGTGGTAGCAAAATCGGAA------TTTTCCGCTTTCAGCCTTGAAG-----TTTTCAATGT------CGGCCACGTGAATTGGG------TTGGGGTTTGAACCTTTAAACGG-TTTAGAACTTGACTTGAAGTT??????????-????????--???????????????????--???????????---------------
	'DH602b_Herpomyces_chaetophilus'     ????????????????????????????????????????TTAGAGGAAGTAAAAGTCGTAACAAGGTTTCCGTAGGT-GAACCTGCGGAAGGATCATTAATGAGTGT-ATCGAGCTTCGCTCTTTGTAAGGATGAAAATTTTTACAAGGGGAGAATGA---CTCGCCTACATTATTCACCCAACGTTGAATTGATGCGTGATCGTGCTGTTCTTGTAGATGCTATTTACCGGAGTACAGACGAAGCTTTAGGAAGGGTTTTCCCATTTAATGATTTGTTT------TGAAGGCAAAATTTTA-------------CAAAAT-ATGT------------AAACTTTCAACAATGGATCTCTTGGTTCTGGCATCGATGAAGAACGCGGCAAAATGCGATAAGTAATGTGAATTGCAGAATTCAGTGAATCATCGAATC-TTTGAACGCAAATTGCGCTTTCTGGTATTCCGGAAAGCACACCTGTTCGAGCGTCAATTTTCA-GATACA--GTACCTTTATT-TCATTTGTATGCTACGGGTGTTATGGATGA--ATTGTTGCAT----------TAAGGTGACTTC---TGACACATC---------TGAAAAATGTCCGCGGCGCTATGGAATGCTTCGGTGGTAGCAAAATCGGAA------TTTTCCGCTTTCAGCCTTGAAG-----TTTTCAATGT------CGGCCACGTGAATTGGG------TTGGGGTTTGAACCTTTAAACGG-TTTAGAACTTGACTTGAAGTTTGTGACCTCG-AATCAGGT--GGGAGTACCCGCTGAACTT--AAGCATATCAATAAG?????????--
	'TW437c_Herpomyces_periplanetae'     ????????????????????????????????????????????????????????????????????????????????????????????GATCATTACTGAGTATTTCGGATTTTCGCTTCTCGTGCGGACCCTAGTCTTAATGGGGAGTGTATTA---TTCGCATGCATTACTTACCAAATGTTGAATTGATACGTGGTGGCGCAAGTCAGGTATTTAATAATGGCTGCGCT------------------TGCGCCGTCACCATTAACCTATAATATTACATGTGATGGCGGACTACGGATTA---------CGAATTAATAT------------AAACTTTCAACAATGGATCTCTTGGTTCTGGCATCGATGAAGAACGCGGCAAAATGCGATAAGTAATGTGAATTGCAGAATTCAGTGAATCATCGAATC-TTTGAACGCAAATTGCGCTTTCTGGTATTCCGGAAAGCACACCTGTTCGAGCGTCAATTTTCA-AAATTA--GTATCCGTTGC-TTGCGTACGCTGGCCGGATGTCTTGGATGAACATTGCTGTGT-TGGCTGCCATGTGGTGGTGCTGATCGGCACATC---------CGAAAGTTGTTTACGGCGATGTGAAGTGCTTCGGGGGTAGCAATGTTGAAGACTTGTGTTTTCGCTTTCAGCCTTGAAG-----TATGGAGCATATG---CGTTTACGT-GTTGAAG------GTCGGGTTGGCTGCGTAGAGCGG-TTCAGCGTTGACCGTGAAGCTTGTGACCTCG-AATCAGGT--GGGAGTACCCGCTGAACTT--AAGCATATCAATA????????????-
	'TW448b_Herpomyces_periplanetae'     ?????????????????????????????????????????TAGAGGAAGTAAAAGTCGTAACAAGGTTTCCGTAGGT-GAACCTGCGGAAGGATCATTACTGAGTATTTCGGATTTTCGCTTCTCGTGCGGACCCTAGTCTTAATGGGGAGTGTATTA---TTCGCATGCATTACTTACCAAATGTTGAATTGATACGTGGTGGCGCAAGTCAGGTATTTAATAATGGCTGCGCT------------------TGCGCCGTCACCATTAACCTATAATATTACATGTGATGGCGGACTACGGATTA---------CGAATTAATAT------------AAACTTTCAACAATGGATCTCTTGGTTCTGGCATCGATGAAGAACGCGGCAAAATGCGATAAGTAATGTGAATTGCAGAATTCAGTGAATCATCGAATC-TTTGAACGCAAATTGCGCTTTCTGGTATTCCGGAAAGCACACCTGTTCGAGCGTCAATTTTCA-AAATTA--GTATCCGTTGC-TTGCGTACGCTGGCCGGATGTCTTGGATGAACATTGCTGTGT-TGGCTGCCATGTGGTGGTGCTGATCGGCACATC---------CGAAAGTTGTTTACGGCGATGTGAAGTGCTTCGGTGGTAGCAATGTTGAAGACTTGTGTTTTCGCTTTCAGCCTTGAAG-----TATGGAGCATATG---CGTTTACGT-GTTGAAG------GTCGGGTTGGCTGCGTAGAGCGG-TTCAGCGTTGACCGTGAAGCTTGTGACCTCG-AATCAGGT--GGGAGTACCCGCTGAACTT--AAGCATATCATA????????????--
	'DH602a_Herpomyces_periplanetae'     -?????????????????????????????TCTTGGTCATTTAGAGGAAGTAAAAGTCGTAACAAGGTTTCCGTAGGT-GAACCTGCGGAAGGATCATTACTGAGTATTTCGGATTTTCGCTTCTCGTGCGGACCCTAGTCTTAATGGGGAGTGTATTA---TTCGCATGCATTACTTACCAAATGTTGAATTGATACGTGGTGGCGCAAGTCAGGTATTTAATAATGGCTGCGCT------------------TGCGCCGTCACCATTAACCTATAATATTACATGTGATGGCGGACTACGGATTA---------CGAATTAATAT------------AAACTTTCAACAATGGATCTCTTGGTTCTGGCATCGATGAAGAACGCGGCAAAATGCGATAAGTAATGTGAATTGCAGAATTCAGTGAATCATCGAATC-TTTGAACGCAAATTGCGCTTTCTGGTATTCCGGAAAGCACACCTGTTCGAGCGTCAATTTTCA-AAATTA--GTATCCGTTGC-TTGCGTACGCTGGCCGGATGTCTTGGATGAACATTGCTGTGT-TGGCTGCCATGTGGTGGTGCTGATCGGCACATC---------CGAAAGTTGTTTACGGCGATGTGAAGTGCTTCGGTGGTAGCAATGTTGAAGACTTGTGTTTTCGCTTTCAGCCTTGAAG-----TATGGAGCATATG---CGTTTACGT-GTTGAAG------GTCGGGTTGGCTGCGTAGAGCGG-TTCAGCGTTGACCGTGAAGCTTGTGACCTC?????????????????????????????????????????????????????------
	'DH654c_Herpomyces_periplanetae'     ???????????????????????????????????????????????????????????????????????????????????????????????????????????????????????????????????????????????????????????????---?????????????????????????????????????????????????????????????????????????????????????????????????????????????????????????????????????????????????????????????????????------------???????????????????????????????????????????????????????????????????????????????????????????????????????????????????????????????????????????????---------------------AAATTA--GTATCCGTTGC-TTGCGTACGCTGGCCGGATGTCTTGGATGAACATTGCTGTGT-TGGCTGCCATGTGGTGGTGCTGATCGGCACATC---------CGAAAGTTGTTTACGGCGATGTGAAGTGCTTCGGTGGTAGCAATGTTGAAGACTTGTGTTTTCGCTTTCAGCCTTGAAG-----TATGGAGCATATG---CGTTTACGT-GTTGAAG------GTCGGGTTGGCTGCGTAGAGCGG-TTCAGCGTTGACCGTGAAGCTTGTGACCTCG-AATCAGGT--GGGAGTACCCGCTGAACTT--AAGCATATCAATAAAGCGGAGGAAA-
	'DH654b_Herpomyces_periplanetae'     ?????????????????????????????????????????????????????????????????????????????????????????????????TTACTGAGTATTTCGGATTTTCGCTTCTCGTGCGGACCCTAGTCTTAATGGGGAGTGTATTA---TTCGCATGCATTACTTACCAAATGTTGAATTGATACGTGGTGGCGCAAGTCAGGTATTTAATAATGGCTGCGCT------------------TGCGCCGTCACCATTAACCTATAATATTACATGTGATGGCGGACTACGGATTA---------CGAATTAATAT------------AAACTTTCAACAATGGATCTCTTGGTTCTGGCATCGAT????????????????????????????????????????????????????????????????????????????????????????????????????????????????????????????????????????????????????????????????????????????????????????????????????????????????????????????????????????????????????????????????????????????????????????????????????????????????????????????????????????????????????????????------?????????????????????????????????????????????????????????????????????????????????????----------------------------
	'DH602c_Herpomyces_periplanetae'     ?????????????????????????????????????????TAGAGGAAGTAAAAGTCGTAACAAGGTTTCCGTAGGT-GAACCTGCGGAAGGATCATTACTGAGTATTTCGGATTTTCGCTTCTCGTGCGGACCCTAGTCTTAATGGGGAGTGTATTA---TTCGCATGCATTACTTACCAAATGTTGAATTGATACGTGGTGGCGCAAGTCAGGTATTTAATAATGGCTGCGCT------------------TGCGCCGTCACCATTAACCTATAATATTACATGTGATGGCGGACTACGGATTA---------CGAATTAATAT------------AAACTTTCAACAATGGATCTCTTGGTTCTGGCATCGATGAAGAACGCGGCAAAATGCGATAAGTAATGTGAATTGCAGAATTCAGTGAATCATCGAATC-TTTGAACGCAAATTGCGCTTTCTGGTATTCCGGAAAGCACACCTGTTCGAGCGTCAATTTTCA-AAATTA--GTATCCGTTGC-TTGCGTACGCTGGCCGGATGTCTTGGATGAACATTGCTGTGT-TGGCTGCCATGTGGTGGTGCTGATCGGCACATC---------CGAAAGTTGTTTACGGCGATGTGAAGTGCTTCGGTGGTAGCAATGTTGAAGACTTGTGTTTTCGCTTTCAGCCTTGAAG-----TATGGAGCATATG---CGTTTACGT-GTTGAAG------GTCGGGTTGGCTGCGTAGAGCGG-TTCAGCGTTGACCGTGAAGCTTGTGACCTCG-AATCAGGT--GGGAGTACCCGCTGAACTT--AAGCATATCAATA????????????-
	'DH602d_Herpomyces_periplanetae'     ?????????????????????????????????????????TAGAGGAAGTAAAAGTCGTAACAAGGTTTCCGTAGGT-GAACCTGCGGAAGGATCATTACTGAGTATTTCGGATTTTCGCTTCTCGTGCGGACCCTAGTCTTAATGGGGAGTGTATTA---TTCGCATGCATTACTTACCAAATGTTGAATTGATACGTGGTGGCGCAAGTCAGGTATTTAATAATGGCTGCGCT------------------TGCGCCGTCACCATTAACCTATAATATTACATGTGATGGCGGACTACGGATTA---------CGAATTAATAT------------AAACTTTCAACAATGGATCTCTTGGTTCTGGCATCGATGAAGAACGCGGCAAAATGCGATAAGTAATGTGAATTGCAGAATTCAGTGAATCATCGAATC-TTTGAACGCAAATTGCGCTTTCTGGTATTCCGGAAAGCACACCTGTTCGAGCGTCAATTTTCA-AAATTA--GTATCCGTTGC-TTGCGTACGCTGGCCGGATGTCTTGGATGAACATTGCTGTGT-TGGCTGCCATGTGGTGGTGCTGATCGGCACATC---------CGAAAGTTGTTTACGGCGATGTGAAGTGCTTCGGTGGTAGCAATGTTGAAGACTTGTGTTTTCGCTTTCAGCCTTGAAG-----TATGGAGCATATG---CGTTTACGT-GTTGAAG------GTCGGGTTGGCTGCGTAGAGCGG-TTCAGCGTTGACCGTGAAGCTTGTGACCTCG-AATCAGGT--GGGAGTACCCGCTGAACTT--AAGCATATCAATAAGC????????--
	'DH620a_Herpomyces_periplanetae'     ??????????????????????????????????????????????????????????????????????????????????????????AGGATCATTACTGAGTATTTCGGATTTTCGCTTCTCGTGCGGACCCTAGTCTTAATGGGGAGTGTATTA---TTCGCATGCATTACTTACCAAATGTTGAATTGATACGTGGTGGCGCAAGTCAGGTATTTAATAATGGCTGCGCT------------------TGCGCCGTCACCATTAACCTATAATATTACATGTGATGGCGGACTACGGATTA---------CGAATTAATAT------------AAACTTTCAACAATGGATCTCTTGGTTCTGGCATCGATGAAGAACGCGGCAAAATGCGATAAGTAATGTGAATTGCAGAATTCAGTGAATCATCGAATC-TTTGAACGCAAATTGCGCTTTCTGGTATTCCGGAAAGCACACCTGTTCGAGCGTCAATTTTCA-AAATTA--GTATCCGTTGC-TTGCGTACGCTGGCCGGATGTCTTGGATGAACATTGCTGTGT-TGGCTGCCATGTGGTGGTGCTGATCGGCACATC---------CGAAAGTTGTTTACGGCGATGTGAAGTGCTTCGGTGGTAGCAATGTTGAAGACTTGTGTTTTCGCTTTCAGCCTTGAAG-----TATGGAGCATATG---CGTTTACGT-GTTGAAG------GTCGGGTTGGCTGCGTAGAGCGG-TTCAGCGTTGACCGTGAAGCTTGTGACCTCG-AATCAGGT--GGGAGTACCCGCTGAACTT--AAGCATATCAATAAGCGGAGGA??--
	'DH1187d_Herpomyces_periplanetae'    -CGGCACACCCGGATCGGAAAGTTGGCCAAATTTGGTCATTTAGAGGAAGTAAAAGTCGTAACAAGGTTTCCGTAGGT-GAACCTGCGGAAGGATCATTACTGAGTATTTCGGATTTTCGCTTCTCGTGCGGACCCTAGTCTTAATGGGGAGTGTATTA---TTCGCATGCATTACTTACCAAATGTTGAATTGATACGTGGTGGCGCAAGTCAGGTATTTAATAATGGCTGCGCT------------------TGCGCCGTCACCATTAACCTATAATATTACATGTGATGGCGGACTACGGATTA---------CGAATTAATAT------------AAACTTTCAACAATGGATCTCTTGGTTCTGGCATCGATGAAGAACGCGGCAAAATGCGATAAGTAATGTGAATTGCAGAATTCAGTGAATCATCGAATC-TTTGAACGCAAATTGCGCTTTCTGGTATTCCGGAAAGCACACCTGTTCGAGCGTCAATTTTCA-AAATTA--GTATCCGTTGC-TTGCGTACGCTGGCCGGATGTCTTGGATGAACATTGCTGTGT-TGGCTGCCATGTGGTGGTGCTGATCGGCACATC---------CGAAAGTTGTTTACGGCGATGTGAAGTGCTTCGGTGGTAGCAATGTTGAAGACTTGTGTTTTCGCTTTCAGCCTTGAAG-----TATGGAGCATATG---CGTTTACGT-GTTGAAG------GTCGGGTTGGCTGCGTAGAGCGG-TTCAGCGTTGACCGTGAAGCTTGTGACCTCG-AATCAGGT--GGGAGTACCCGCTGAACTT--AAGCATATCAATAAGCGGAGGAAA--
	'DH1365a_Herpomyces_paranensis'      ???????????????????????????????????????????????????????????????????????????????????????????GGATCATTAACGAGAGTGGTCGAGCGCTGCTTCGTGCGTTGGCTATTGTCAGCGAACGGAGGACGTTG---CTTGCATACATCACTTACCCAGTGTCGAATAGAAAGGTGGTGATAAGAGGCTACCTGTTGGTAGCTTCCGCTTT------------------CCTCTTTCCGCCGTTAGACTATGCGTTTACATGGGCTGACAAAAAATAATTTA---------CAAGTTAATT-------------AAACTTTCAACAATGGATCTCTTGGTTCTGGCATCGATGAAGAACGCGGCAAAATGCGATAAGTAATGTGAATTGCAGAATTCAGTGAATCATCGAATC-TTTGAACGCAAATTGCGCTTTCTGGTACTCCGGAAAGCACACCTGTTCGAGCGTCAATTTTCATAATTTA--CTATCCAAGT--TTCTCTTTACTGTCTGGATGTTTTGGGCGATTATTGCTGCGC-TAGCGGTTGCTACGTAGCATTAGCCGGCATGCC---------TGAAAGTGATCCGTAGCACTGCGGAAAGCTTCGGTGGTAGCAATGTTGAAGATGCCTGTCTTCATACTTAGCCTTGATG-----TCTCGGGTGCGTAGCGTGTACACTT-TTTGAGG------TCATTGAGGACATCTAAAGGCAG--TTATCAATGACCGTGAATTTTGTGACCTCG-AATCAGGT--GGGAGTACCCGCTGAACTT--AAGCATATCAATAA???????????-
	'DH1365b_Herpomyces_paranensis'      ----------------------------------?????????????????????????????????????????????????????????????????????????????????????????????????????????????????????????????????????????????????????????????????????????????????????????????????????????????????????????????????????????????????????????????????????????????????????????????????????????????????????????????????????????TTTCTGGCATCGATGAAGAACGCGGCAAAATGCGATAAGTAATGTGAATTGCAGAATTCAGTGAATCATCGAATC-TTTGAACGCAAATTGCGCTTTCTGGTACTCCGGAAAGCACACCTGTTCGAGCGTCAATTTTCATAATTTA--CTATCCAAGT--TTCTCTTTACTGTCTGGATGTTTTGGGCGATTATTGCTGCGC-TAGCGGTTGCTACGTAGCATTAGCCGGCATGCC---------TGAAAGTGATCCGTAGCACTGCGGAAAGCTTCGGTGGTAGCAATGTTGAAGATGCCTGTCTTCATACTTAGCCTTGATG-----TCTCGGGTGCGTAGCGTGTACACTT-TTTGAGG------TCATTGAGGACATCTAAAGGCAG--TTATCAATGACCGTGAATTTTGTGACCTCG-AATCAGGT--GGGAGTACCCGCTGAACTT--AAGCATATCAATAAGCGGAGGAA?--
	'Debr_Ppal_Herpomyces_leurolestis'   ???????????????????????????????????????????????????????????????????????????????????CTGCGGAAGGATCATTACAGAGTACTGTTGGGCCCGATTTTTGGTGGTGACGGCAGTCATTACGAAAAATCGGTGT---CTCGCTAACACTACTTACCACTTGTCGATAAATTGGGCGGCAGCGCAAAACAGCCTCGTGCTTGTGGCAACGGC------------------CTGAGCCTTGCGTTTAAAACGCAAATTTTC--GTGATTAATTAGCCTAACGTAAAGCATTATCAAAATAATT-------------AAACTTTCAACAATGGATCTCTTGGTTCTGGCATCGATGAAGAACGCGGCAAAATGCGATAAGTAATGTGAATTGCAGAATTCAGTGAATCATCGAATC-TTTGAACGCAAATTGCGCTTTCTGGTATCCCGGAAAGCACACCTGTTCGAGCGTCAATTTTCA---TTTACCCTATCCAGCA--TCCTATGAGGAAGTTGGATGTGTTGAACGGCAATTGCTGCGC-TGATCGTGTTAACATGACGTTGGCTGGCACGTT---------CGAAAGTGGTTT-TAGCGCTATGAATGGCTTCGGTAGTGGCAATTTTGAGAG--TAAAATCTTGTATTCAGCCTTGAAG-----CCTCAAAGACG-----CGACTGCAA-ACTTATG------GTAGGTGTCGTTTTCTAAGCAGA--CTGGCGCCAACCGCGAAATTTGTGACCTC?-????????????????????????????????????????????????????-----
	'2017/0199_Herpomyces_leurolestis'   ????????????????????????????????????????????????????????????????????????????????????????????????ATTACAGAGTACTGTTGGGCCCGATTTTTGGTGGTGACGGCAGTCATTACGAAAAATCGGTGT---CTCGCTAACACTACTTACCACTTGTCGATAAATTGGGCGGCAGCGCAAAACAGCCTCGTGCTTGTGGC?ACGGC------------------CTGAGCCTTGCGTTTAAAACGCAAATTTTC--GTGATTAATTAGCCTAACGTAAAGCATTATCAAAATAATT-------------AAACTTTCAACAATGGATCTCTTGGTTCTGGCATCGATGAA?AACGCGGCAAAATGCGATAAGTAATGTGAATTGCAGAATTCAGTGAATCATCGAATC-TTTGAACGCAAATTGCGCTTTCTGGTATCCCGGAAAGCACACCTGTTCG-GCGTCAATTTTCA---TTTACCCTATCCAGCA--TCCTATGAGGAAGTTGGATGTGTTGAACGGCAATTGCTGCGC-TGATCGTGTTAACATGACGTTGGCTGGCACGTT---------CGAAAGTGGTTT-TAGCGCTATGAATGGCTTCGGTAGTGGCAATTTTGAGAG--TAAAATCTTGTATTCAGCCTTGAAG-----CCTCAAAGACG-----CGACTGCAA-ACTTATG------GTAGGTGTCGTTTTCTAAGCAGA--CTGGCGCCAACCGCGAAATTTGTGACCTCG-AATCAGGT--GG??????????????????????????????????????????---
	'DH1417b_Herpomyces_leurolestis'     ----------------------------------?????????????????????????????????????????????????????????????????????????????????????????????????????????????????????????????????????????????????????????????????????????????????????????????????????????????????????????????????????????????????????????????????????????????????????????????????????????????????????????????????????????TTTCTGGCATCGATGAAGAACGCGGCAAAATGCGATAAGTAATGTGAATTGCAGAATTCAGTGAATCATCGAATC-TTTGAACGCAAATTGCGCTTTCTGGTATCCCGGAAAGCACACCTGTTCGAGCGTCAATTTTCA---TTTACCCTATCCAGCA--TCCTATGAGGAAGTTGGATGTGTTGAACGGCAATTGCTGCGC-TGATCGTGTTAACATGACGTTGGCTGGCACGTT---------CGAAAGTGGTTT-TAGCGCTATGAATGGCTTCGGTAGTGGCAATTTTGAGAG--TAAAATCTTGTATTCAGCCTTGAAG-----CCTCAAAGACG-----CGACTGCAA-ACTTATG------GTAGGTGTCGTTTTCTAAGCAGA--CTGGCGCCAACCGCGAAATTTGTGACCTCG-AATCAGGT--GGGAGTACCCGCTGAACTT--AAGCATATCAATAAGCGGAGGA??--
	'MN597427_Herpomyces_spegazzinii'    -------------------------------------------------------------ACAAGGTTTCCGTAGGT-GAACCTGCGGAAGGATCATTAACGAGTATCGTTGGACCTTGCTTTTTGGGTAGACGAATGTCTTCGCAAAATGTGAGTTG---TTCGCGTAAATTACTTACCAAACGTTGAATCGATACGTGGTAGCACAGGTCGATCATT---CGCTGGTCGTACT------------------TGTGCTATCACCGTTAACCTATACATTTACATATGATGGCGAAAACATACACAAATTA----CAAGTT-ATAT------------AAACTTTCAACAATGGATCTCTTGGTTCTGGCATCGATGAAGAACGCGGCAAAATGCGATAAGTAATGTGACTTGCAGAATTTAGTGAATCATCGAATC-TTTGAACGCAAATTGCGCTTTCTGGTATTCCGGAAAGCACACCTGTTCGAGCGTCAATTTTCA-AATATA--ATATTCAATA--GTTGCTTTGCAACTTGGATGTACTGGATGAGCATTGCTGTGTCTTACTGCT-TAATGTGGTATTGACCGGCACATC---------CGAAAGTGATCTATTGCGTTGCAAAGCGCTTCGGTTGTAGCAATGATGAAGACTTATGTCTTCGCTTTCAGCCTTGAAG-----CGTGGAGCTTTTG---CGTTTACGC-ACTGAGG------CTAGCGCTAATTACGTAAAGTGA-GCCAGCGTTAGCCGTGAAACTTGTGACCTCG-AATCAGGT--GGGAGTACCCGCTGAACTT--AAGCATATCA----------------
	'MN597428_Herpomyces_spegazzinii'    -------------------------------------------------------------ACAAGGTTTCCGTAGGT-GAACCTGCGGAAGGATCATTAACGAGTATCGTTGGACCTTGCTTTTTGGGTAGACGAATGTCTTCGCAAAATGTGAGTTG---TTCGCGTAAATTACTTACCAAACGTTGAATCGATACGTGGTAGCACAGGTCGATCATT---CGCTGGTCGTACT------------------TGTGCTATCACCGTTAACCTATACATTTACATATGATGGCGAAAACATACACAAATTA----CAAGTT-ATAT------------AAACTTTCAACAATGGATCTCTTGGTTCTGGCATCGATGAAGAACGCGGCAAAATGCGATAAGTAATGTGACTTGCAGAATTTAGTGAATCATCGAATC-TTTGAACGCAAATTGCGCTTTCTGGTATTCCGGAAAGCACACCTGTTCGAGCGTCAATTTTCA-AATATA--ATATTCAATA--GTTGCTTTGCAACTTGGATGTACTGGATGAGCATTGCTGTGTCTTACTGCT-TAATGTGGTATTGACCGGCACATC---------CGAAAGTGATCTATTGCGTTGCAAAGCGCTTCGGTTGTAGCAATGATGAAGACTTATGTCTTCGCTTTCAGCCTTGAAG-----CGTGGAGCTTTTG---CGTTTACGC-ACTGAGG------CTAGCGCTAATTACGTAAAGTGA-GCCAGCGTTAGCCGTGAAACTTGTGACCTCG-AATCAGGT--GGGAGTACCCGCTGAACTT--AAGC----------------------
	'Pyxidiophora_arvernensis_CBS253_81' -------------------------------------------------------AGCGTAACAAGGTTTCCGTAGGT-GAACCTGCGGAAGGATCATTATTGAGTA---------------------ACTGGGGGTAGCTTTGGTATGTAATGTACCAAACTACCCTTACACTCTTCACCCTTTGTT--ATTTTTTCTCAGTTGCTTTGGCAGAGCCTTGTGTTCTGCC------------------------AGAGGATACATATCAAACCATTTTGTTAACCAATAATTGGGGTACTTGTAGTCTGATT----TAG-TTACTTT-AATAGTATACAAAACTTTCAACAACGGATCTCTTGGTTCTGGCATCGATGAAGAACGCAGCCAAATGCGATAAGTAATGTGAATTGCAGAATTCCGTGAATCATCGAATC-TTTGAACGCACATTGCGCCTCTTGGTAATCCAGGAGGCATGCCTGTCTGAGCGTC---------AGTACA--CCATTTAAACCATATCTTTTTTAGACTTGGTTTAGT-CATGAAGATT-----------------TGACCCTATCTTTGTAGAGTCTTCTTTGTAAAGTATTGACTGTTTGC----TAACACAAGTCTTTAGTTGTGACAA-----------------TTTGTATTCAACTTGAAAGACGAGTGTTTGGTATGTCACTTGTTCATTT-TAAGGAGTAACTTGTGTGCCCCTTTTTCTAAA-------------------------CATTGACCTCA-GATCAGGT--AGGGATACCCGCTGAACTT--AAGCATATCT----------------
	'MG200_Pyxidiophora_microspora'      ?????????????????????????????????????????????????????????????????TTAGCTCGTAGGT--GACCTGCGG-AGGATCATTACTGAGT--TATTAAGGTTTACAACCCGCAAGGGTGAGTA-----------------------CTCCTTTCTTCTCTTCACCCTTTGTT--ATTATTACTTAGTTGCTTTGGTAGCTTGCTT--TGGCATCTA?GAC----------------------------CATTTAACACTTTGTTATTTGTCTTAT-------------GTCTGATT----TTTATAACTTTAATAAGTAAATAAAACTTTCAACAACGGATCTCTTGGTTCTGGCATCGATGAAGAACGCAGCAAAATGCGATAAGTAATGTGAATTGCAGAATTCCGTGAATCATCAAATC-TTTGAACGCACATTGCGCCTTCTGGTAATCCGGAAGGCATGCCTGTCTGAGCGTCA--TTACACCATTCA--------AACTTATCTTTATTGTGTTTTGGAAGTA------GACAATTAATTTAT-------------------ATTGATTTTCTCTTCTGTATA---TGACGATTGTCTACTGTTT----------CTTAGTTGTAGCA----------TGTATTTTCTCAACTTCAAGATAGCAG-----CATGTCCCTCTTTTCTTGACTACTTTTGCAAAA---------GAGTTTTCAATTTTAAGT--------------------------TGACCTCA-GATCAG---------TAGATGCCA????????????????????????????????-
	'Pyxidiophora_arvernensis_CBS657_82' ----------------------------------------------------------------------------------------------TCATTATTGAGTA----------------------CTGGGGGTAGCTTTGGTATGTAATGTACCAAACTACCCTTACACTCTTCACCCTTTGTT--ATTTTTTCTCAGTTGCTTTGGCAGAGCCTTGTGTTCTGCC------------------------AGAGGATACATATCAAACCATTTTGTTAACCAATAATTGGGGTACTTGTAGTCTGATT----TAGGTTACTTTAAATAGTATACAAAACTTTCAACAACGGATCTCTTGGTTCTGGCATCGATGAAGAACGCAGCCAAATGCGATAAGTAATGTGAATTGCAGAATTCCGTGAATCATCGAATCTTTTGAACGCACATTGCGCCTCTTGGTAATCCAGGAGGCATGCCTGTCTGAGCGTC---------AGTACA--CCATTTAAACCATATCTTTTTTAGACTTGGTTTAAGTCATGAAGATT-----------------TGACCCTATCTTTGTAGAGTCTTCTTTGTAAAGTATTGACTGTTTGC----TAACACAAGTCTTTAGTTGTGACAA-----------------TTTGTATTCAACTTGAAAGACGAGTGTTTGGTATGTCACTTGTTCATTTTAAGGGAGTAACTTGTGTGCCCCTTTTTCTAAAACAT------------------------TGACCTCAGGATCAGGTAGGGGATACCCCGCTGAAACTTAAAGCATATCAA---------------

;


END;

BEGIN ASSUMPTIONS;
	TYPESET * UNTITLED   =  unord:  1 -  844;

END;

BEGIN NOTES;

	TAXABITS   NAME = newlyAddedTaxon on =  1 -  33;

END;

BEGIN CODONS;
	CODESET * UNTITLED   =  universal:  1 -  844;


END;

BEGIN MESQUITECHARMODELS;
	ProbModelSet * UNTITLED   =  'Jukes-Cantor':  1 -  844;
END;

Begin MESQUITE;
		MESQUITESCRIPTVERSION 2;
		TITLE AUTO;
		tell ProjectCoordinator;
		timeSaved 1572327148948;
		getEmployee #mesquite.minimal.ManageTaxa.ManageTaxa;
		tell It;
			setID 0 5454413738794608901;
		endTell;
		getEmployee #mesquite.charMatrices.ManageCharacters.ManageCharacters;
		tell It;
			setID 0 7845593917435231981;
			mqVersion 320;
			checksumv 0 3 488457215 null  getNumChars 844 numChars 844 getNumTaxa 33 numTaxa 33   short true   bits 15   states 15   sumSquaresStatesOnly 496217.0 sumSquares 496217.0 longCompressibleToShort false usingShortMatrix true   NumFiles 1 NumMatrices 1;
			mqVersion;
		endTell;
		getWindow;
		tell It;
			suppress;
			setResourcesState true false 296;
			setPopoutState 300;
			setExplanationSize 0;
			setAnnotationSize 0;
			setFontIncAnnot 0;
			setFontIncExp 0;
			setSize 700 464;
			setLocation 8 8;
			setFont SanSerif;
			setFontSize 10;
			getToolPalette;
			tell It;
			endTell;
			desuppress;
		endTell;
		endTell;
end;
